# Supplementary material
Source: publisher figshare collection journal article supplement (https://frontiersin.figshare.com/ndownloader/files/14395163)
Supplement: Supplementary file [file 14395163]

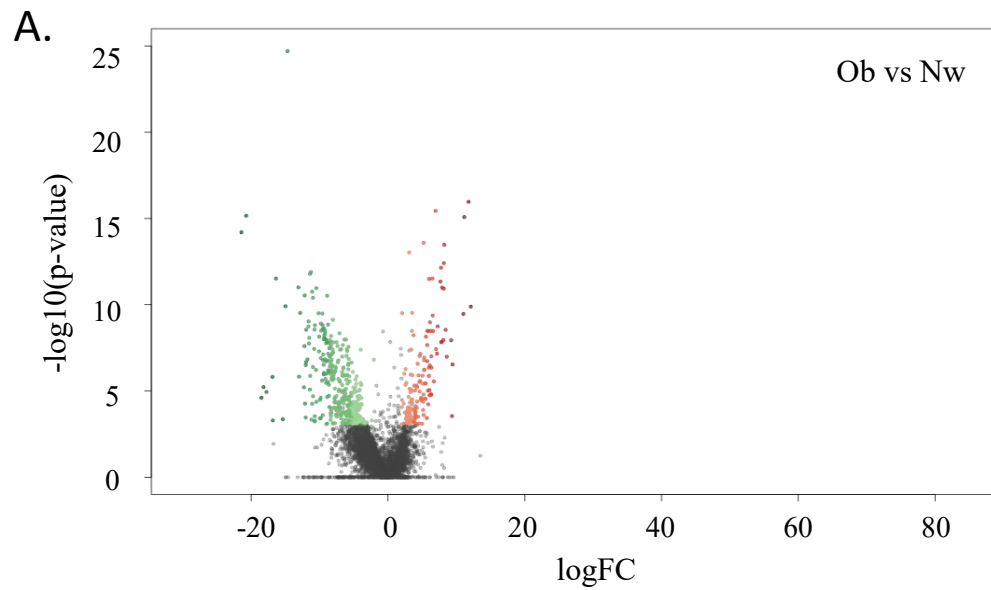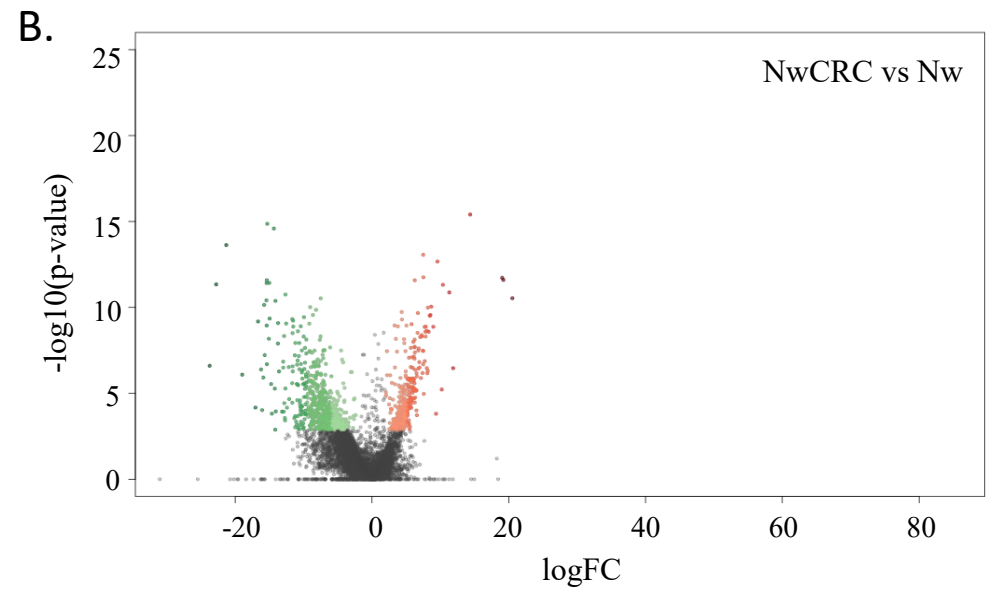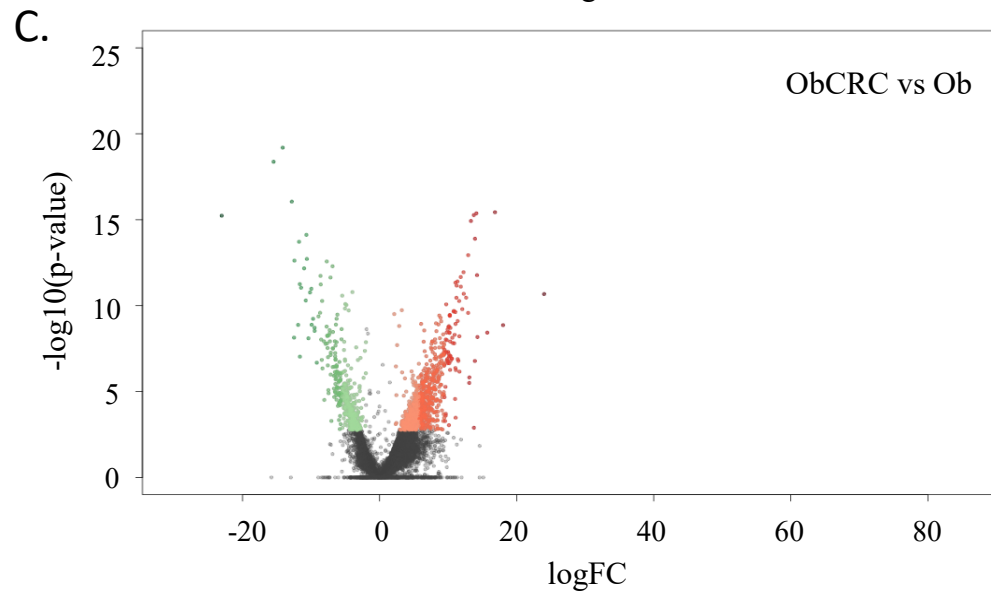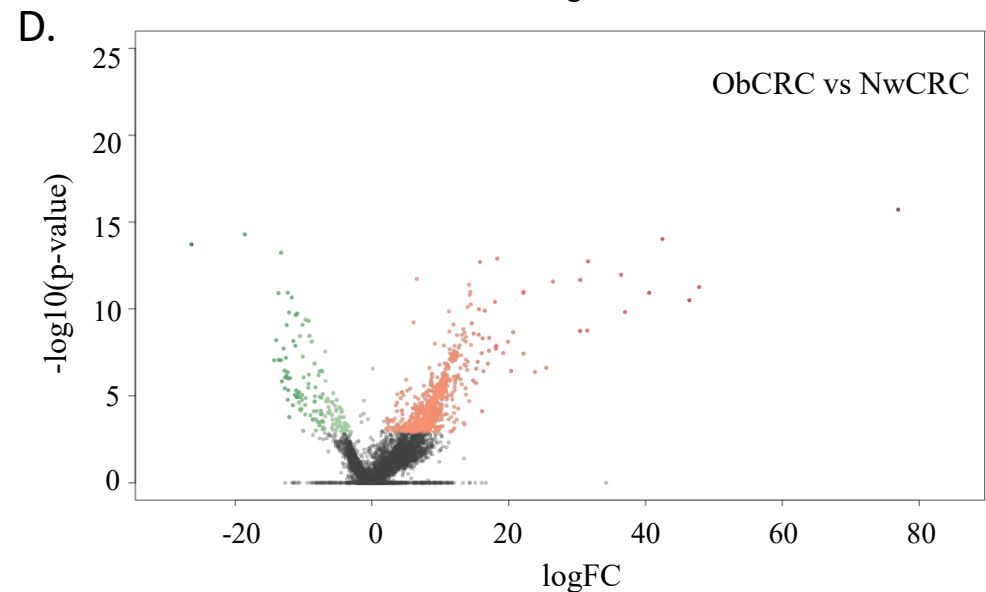

**Supplemental Data 3: Volcano plots of differentially expressed transcripts.** Scatter-plots of significance [ $-\log_{10}(\text{p-value})$ ] versus fold-change [ $\log_2(\text{FC})$ ], also called Volcano plots, of the four differentially expressed comparisons: (A) obese (Ob) vs normal weight (Nw); (B) normal weight affected by CRC (NwCRC) vs normal weight (Nw); (C) obese affected by CRC (ObCRC) vs obese (Ob); (D) obese affected by CRC (ObCRC) vs normal weight affected by CRC (NwCRC). Colored points represent differentially expressed transcripts (FDR lower than 0,05 and  $\log_2(\text{FC})$  greater than  $|2|$ ). Red and green shades (up- and down-modulated transcripts) are proportional to the  $\log_2(\text{FC})$  absolute values.
